# Supplementary material for: Genomic structures of rDNA clusters in Eimeria acervulina
Source: Research Square preprint supplement (doi:10.21203/rs.3.rs-8283237/v1), 2025-12-15
Supplement: Supplementary file 1 [file 8b5d01d191ec5f3bf95f094e.xlsx]

## Sheet: Sheet1
sequence ID	Description
AY742227.1	Eimeria acervulina 5.8S ribosomal RNA gene, partial sequence; internal transcribed spacer 2, complete sequence; and 28S ribosomal RNA gene, partial sequence
AF307889.1	Eimeria acervulina 23S ribosomal RNA gene, partial sequence; plastid gene for plastid product
OR372143.1	Eimeria acervulina isolate acervulina18S01 small subunit ribosomal RNA gene, partial sequence
OR372142.1	Eimeria acervulina isolate acervulina18S02 small subunit ribosomal RNA gene, partial sequence
OR372141.1	Eimeria acervulina isolate acervulina18S03 small subunit ribosomal RNA gene, partial sequence
OR372140.1	Eimeria acervulina isolate acervulina18S04 small subunit ribosomal RNA gene, partial sequence
OR372139.1	Eimeria acervulina isolate acervulina18S10 small subunit ribosomal RNA gene, partial sequence
OR372138.1	Eimeria acervulina isolate acervulina18S11 small subunit ribosomal RNA gene, partial sequence
OR372137.1	Eimeria acervulina isolate acervulina18S12 small subunit ribosomal RNA gene, partial sequence
OR372136.1	Eimeria acervulina isolate acervulina18S13 small subunit ribosomal RNA gene, partial sequence
OR226405.1	Eimeria acervulina isolate altSP2 small subunit ribosomal RNA gene, partial sequence
MW090937.1	Eimeria acervulina isolate 12615 small subunit ribosomal RNA gene, partial sequence
MG797522.1	Eimeria acervulina isolate Mizoram small subunit ribosomal RNA gene and internal transcribed spacer 1, partial sequence
MH620350.1	Eimeria acervulina small subunit ribosomal RNA gene and internal transcribed spacer 1, partial sequence
MH620349.1	Eimeria acervulina isolate VPA/E. acervulina/AP small subunit ribosomal RNA gene and internal transcribed spacer 1, partial sequence
MH620348.1	Eimeria acervulina isolate VPA/E. acervulina/Nagaland small subunit ribosomal RNA gene and internal transcribed spacer 1, partial sequence
MH620347.1	Eimeria acervulina isolate VPA/E. acervulina/Meghalaya small subunit ribosomal RNA gene and internal transcribed spacer 1, partial sequence
MH620346.1	Eimeria acervulina isolate VPA/E. acervulina/Trpura small subunit ribosomal RNA gene and internal transcribed spacer 1, partial sequence
HQ173839.1	Eimeria acervulina strain H 23S large subunit ribosomal RNA gene, partial sequence; apicoplast
GQ153618.1	Eimeria acervulina isolate EACESH3 5.8S ribosomal RNA gene, partial sequence; internal transcribed spacer 2, complete sequence; and 28S ribosomal RNA gene, partial sequence
GQ153623.1	Eimeria acervulina isolate EACESH3 18S ribosomal RNA gene, partial sequence; internal transcribed spacer 1, complete sequence; and 5.8S ribosomal RNA gene, partial sequence
FJ236372.1	Eimeria acervulina clone 118-77 18S ribosomal RNA gene, partial sequence
AY943280.1	Eimeria acervulina 5S ribosomal RNA gene, partial sequence
AY779492.1	Eimeria acervulina clone EA-JJ-30 18S ribosomal RNA gene, partial sequence; internal transcribed spacer 1, 5.8S ribosomal RNA gene, and internal transcribed spacer 2, complete sequence; and 28S ribosomal RNA gene, partial sequence
AY779491.1	Eimeria acervulina clone EA-JJ-28 18S ribosomal RNA gene, partial sequence; internal transcribed spacer 1, 5.8S ribosomal RNA gene, and internal transcribed spacer 2, complete sequence; and 28S ribosomal RNA gene, partial sequence
AY779490.1	Eimeria acervulina clone EA-JJ-25 18S ribosomal RNA gene, partial sequence; internal transcribed spacer 1, 5.8S ribosomal RNA gene, and internal transcribed spacer 2, complete sequence; and 28S ribosomal RNA gene, partial sequence
AY779489.1	Eimeria acervulina clone EA-JJ-20 18S ribosomal RNA gene, partial sequence; internal transcribed spacer 1, 5.8S ribosomal RNA gene, and internal transcribed spacer 2, complete sequence; and 28S ribosomal RNA gene, partial sequence
AY779488.1	Eimeria acervulina clone EA-JJ-19 18S ribosomal RNA gene, partial sequence; internal transcribed spacer 1, 5.8S ribosomal RNA gene, and internal transcribed spacer 2, complete sequence; and 28S ribosomal RNA gene, partial sequence
AY779487.1	Eimeria acervulina clone EA-JJ-18 18S ribosomal RNA gene, partial sequence; internal transcribed spacer 1, 5.8S ribosomal RNA gene, and internal transcribed spacer 2, complete sequence; and 28S ribosomal RNA gene, partial sequence
AY779486.1	Eimeria acervulina clone EA-JJ-16 18S ribosomal RNA gene, partial sequence; internal transcribed spacer 1, 5.8S ribosomal RNA gene, and internal transcribed spacer 2, complete sequence; and 28S ribosomal RNA gene, partial sequence
AY779485.1	Eimeria acervulina clone EA-JJ-15 18S ribosomal RNA gene, partial sequence; internal transcribed spacer 1, 5.8S ribosomal RNA gene, and internal transcribed spacer 2, complete sequence; and 28S ribosomal RNA gene, partial sequence
AY779484.1	Eimeria acervulina clone EA-JJ-14 18S ribosomal RNA gene, partial sequence; internal transcribed spacer 1, 5.8S ribosomal RNA gene, and internal transcribed spacer 2, complete sequence; and 28S ribosomal RNA gene, partial sequence
AY779483.1	Eimeria acervulina clone EA-JJ-13 18S ribosomal RNA gene, partial sequence; internal transcribed spacer 1, 5.8S ribosomal RNA gene, and internal transcribed spacer 2, complete sequence; and 28S ribosomal RNA gene, partial sequence
AY779482.1	Eimeria acervulina clone EA-JJ-2 18S ribosomal RNA gene, partial sequence; internal transcribed spacer 1, 5.8S ribosomal RNA gene, and internal transcribed spacer 2, complete sequence; and 28S ribosomal RNA gene, partial sequence
AY779481.1	Eimeria acervulina clone EA-JJ-1 18S ribosomal RNA gene, partial sequence; internal transcribed spacer 1, 5.8S ribosomal RNA gene, and internal transcribed spacer 2, complete sequence; and 28S ribosomal RNA gene, partial sequence
AY779480.1	Eimeria acervulina clone EA-12-24 18S ribosomal RNA gene, partial sequence; internal transcribed spacer 1, 5.8S ribosomal RNA gene, and internal transcribed spacer 2, complete sequence; and 28S ribosomal RNA gene, partial sequence
AY779479.1	Eimeria acervulina clone EA-12-23 18S ribosomal RNA gene, partial sequence; internal transcribed spacer 1, 5.8S ribosomal RNA gene, and internal transcribed spacer 2, complete sequence; and 28S ribosomal RNA gene, partial sequence
AY779478.1	Eimeria acervulina clone EA-12-22 18S ribosomal RNA gene, partial sequence; internal transcribed spacer 1, 5.8S ribosomal RNA gene, and internal transcribed spacer 2, complete sequence; and 28S ribosomal RNA gene, partial sequence
AY779477.1	Eimeria acervulina clone EA-12-17 18S ribosomal RNA gene, partial sequence; internal transcribed spacer 1, 5.8S ribosomal RNA gene, and internal transcribed spacer 2, complete sequence; and 28S ribosomal RNA gene, partial sequence
AY779476.1	Eimeria acervulina clone EA-12-16 18S ribosomal RNA gene, partial sequence; internal transcribed spacer 1, 5.8S ribosomal RNA gene, and internal transcribed spacer 2, complete sequence; and 28S ribosomal RNA gene, partial sequence
AY779475.1	Eimeria acervulina clone EA-12-14 18S ribosomal RNA gene, partial sequence; internal transcribed spacer 1, 5.8S ribosomal RNA gene, and internal transcribed spacer 2, complete sequence; and 28S ribosomal RNA gene, partial sequence
AY779474.1	Eimeria acervulina clone EA-12-13 18S ribosomal RNA gene, partial sequence; internal transcribed spacer 1, 5.8S ribosomal RNA gene, and internal transcribed spacer 2, complete sequence; and 28S ribosomal RNA gene, partial sequence
AY779473.1	Eimeria acervulina clone EA-12-9 18S ribosomal RNA gene, partial sequence; internal transcribed spacer 1, 5.8S ribosomal RNA gene, and internal transcribed spacer 2, complete sequence; and 28S ribosomal RNA gene, partial sequence
AY779472.1	Eimeria acervulina clone EA-12-7 18S ribosomal RNA gene, partial sequence; internal transcribed spacer 1, 5.8S ribosomal RNA gene, and internal transcribed spacer 2, complete sequence; and 28S ribosomal RNA gene, partial sequence
AY779471.1	Eimeria acervulina clone EA-12-6 18S ribosomal RNA gene, partial sequence; internal transcribed spacer 1, 5.8S ribosomal RNA gene, and internal transcribed spacer 2, complete sequence; and 28S ribosomal RNA gene, partial sequence
AY779470.1	Eimeria acervulina clone EA-12-5 18S ribosomal RNA gene, partial sequence; internal transcribed spacer 1, 5.8S ribosomal RNA gene, and internal transcribed spacer 2, complete sequence; and 28S ribosomal RNA gene, partial sequence
AY779469.1	Eimeria acervulina clone EA-12-3 18S ribosomal RNA gene, partial sequence; internal transcribed spacer 1, 5.8S ribosomal RNA gene, and internal transcribed spacer 2, complete sequence; and 28S ribosomal RNA gene, partial sequence
AY779468.1	Eimeria acervulina clone EA-12-2 18S ribosomal RNA gene, partial sequence; internal transcribed spacer 1, 5.8S ribosomal RNA gene, and internal transcribed spacer 2, complete sequence; and 28S ribosomal RNA gene, partial sequence
AY779467.1	Eimeria acervulina clone EA-12-1 18S ribosomal RNA gene, partial sequence; internal transcribed spacer 1, 5.8S ribosomal RNA gene, and internal transcribed spacer 2, complete sequence; and 28S ribosomal RNA gene, partial sequence
AY779466.1	Eimeria acervulina clone EA-1133-26 18S ribosomal RNA gene, partial sequence; internal transcribed spacer 1, 5.8S ribosomal RNA gene, and internal transcribed spacer 2, complete sequence; and 28S ribosomal RNA gene, partial sequence
AY779465.1	Eimeria acervulina clone EA-1133-24 18S ribosomal RNA gene, partial sequence; internal transcribed spacer 1, 5.8S ribosomal RNA gene, and internal transcribed spacer 2, complete sequence; and 28S ribosomal RNA gene, partial sequence
AY779464.1	Eimeria acervulina clone EA-1133-23 18S ribosomal RNA gene, partial sequence; internal transcribed spacer 1, 5.8S ribosomal RNA gene, and internal transcribed spacer 2, complete sequence; and 28S ribosomal RNA gene, partial sequence
AY779463.1	Eimeria acervulina clone EA-1133-22 18S ribosomal RNA gene, partial sequence; internal transcribed spacer 1, 5.8S ribosomal RNA gene, and internal transcribed spacer 2, complete sequence; and 28S ribosomal RNA gene, partial sequence
AY779462.1	Eimeria acervulina clone EA-1133-20 18S ribosomal RNA gene, partial sequence; internal transcribed spacer 1, 5.8S ribosomal RNA gene, and internal transcribed spacer 2, complete sequence; and 28S ribosomal RNA gene, partial sequence
AY779461.1	Eimeria acervulina clone EA-1133-17 18S ribosomal RNA gene, partial sequence; internal transcribed spacer 1, 5.8S ribosomal RNA gene, and internal transcribed spacer 2, complete sequence; and 28S ribosomal RNA gene, partial sequence
AY779460.1	Eimeria acervulina clone EA-1133-15 18S ribosomal RNA gene, partial sequence; internal transcribed spacer 1, 5.8S ribosomal RNA gene, and internal transcribed spacer 2, complete sequence; and 28S ribosomal RNA gene, partial sequence
AY779459.1	Eimeria acervulina clone EA-1133-13 18S ribosomal RNA gene, partial sequence; internal transcribed spacer 1, 5.8S ribosomal RNA gene, and internal transcribed spacer 2, complete sequence; and 28S ribosomal RNA gene, partial sequence
AY779458.1	Eimeria acervulina clone EA-1133-9 18S ribosomal RNA gene, partial sequence; internal transcribed spacer 1, 5.8S ribosomal RNA gene, and internal transcribed spacer 2, complete sequence; and 28S ribosomal RNA gene, partial sequence
AY779457.1	Eimeria acervulina clone EA-1133-7 18S ribosomal RNA gene, partial sequence; internal transcribed spacer 1, 5.8S ribosomal RNA gene, and internal transcribed spacer 2, complete sequence; and 28S ribosomal RNA gene, partial sequence
AY779456.1	Eimeria acervulina clone EA-1133-5 18S ribosomal RNA gene, partial sequence; internal transcribed spacer 1, 5.8S ribosomal RNA gene, and internal transcribed spacer 2, complete sequence; and 28S ribosomal RNA gene, partial sequence
U67115.1	Eimeria acervulina small subunit ribosomal RNA gene, complete sequence
PQ211008.1	Eimeria acervulina isolate IQD.2 small subunit ribosomal RNA gene, partial sequence
KT184333.1	Eimeria acervulina strain NC3 18S small subunit ribosomal RNA gene, partial sequence
JN181059.1	Eimeria acervulina strain USDA 84 23S ribosomal RNA gene, partial sequence; plastid
JN181043.1	Eimeria acervulina strain USDA 84 16S ribosomal RNA gene, partial sequence; plastid
XM_013392569.1	Eimeria acervulina ribosomal RNA assembly protein, putative partial mRNA
XM_013391055.1	Eimeria acervulina ribosomal RNA methyltransferase, putative partial mRNA
GU593707.1	Eimeria acervulina strain Miska2 28S ribosomal RNA gene, partial sequence
HQ680473.1	Eimeria acervulina isolate TR-acervulina-EG1 small subunit ribosomal RNA gene, partial sequence; internal transcribed spacer 1, complete sequence; and 5.8S ribosomal RNA gene, partial sequence
EF210324.1	Eimeria acervulina strain Shanghai small subunit ribosomal RNA gene, partial sequence
EF210323.1	Eimeria acervulina strain precocious line small subunit ribosomal RNA gene, partial sequence
FJ449688.1	Eimeria acervulina strain Shanghai internal transcribed spacer 1 and 5.8S ribosomal RNA gene, partial sequence
FJ449687.1	Eimeria acervulina strain Shanghai internal transcribed spacer 1 and 5.8S ribosomal RNA gene, partial sequence
EF175928.1	Eimeria acervulina strain 1201 small subunit ribosomal RNA gene, partial sequence
DQ538351.1	Eimeria acervulina strain Yangda small subunit ribosomal RNA gene, partial sequence
DQ136187.1	Eimeria acervulina strain Shanghai small subunit ribosomal RNA gene, complete sequence
M59482.1	E.acervulina small subunit ribosomal RNA, partial sequence
M59481.1	E.acervulina small subunit ribosomal RNA, partial sequence
M59480.1	E.acervulina small subunit ribosomal RNA, partial sequence
