# Supplementary material for: Genomic structures of rDNA clusters in Eimeria acervulina
Source: Research Square preprint supplement (doi:10.21203/rs.3.rs-8283237/v1), 2025-12-15
Supplement: Supplementary file 2 [file a4ae86d92667bffdf5936cd4.xlsx]

## Sheet: ITS1
>E.acervulina BJ, CHN, PQ738239
TTGCGTCTCAAAGCTGCTTCATCAGACAGTGACTCAATTTTTGGGGCTTGGATGATGTTTGCTGCTGCGAGGGAACGCTTAATTGAACCTTATCATCTACCAATCTTTGAATCTGTTTTGTTTTCCCACCACGACGCATTTTTGTGAAGAAAAAGAGAGGAAAAAACCTGACTGTGCAAGCATCATTGCCACCTTTTGAAGGGATTGGATGATGATGCATGCATGGGAAGGGGGGGGGCGGCGCATGCACCGCTTGGGGCTTTTTGGGGCTTTGGGGCTGTGGTGGTGGGGCTTGCATGCTACATGTGACCCTGGCACTGCTGTCTATGATGAGCATCCATAGCGCCAGCGTGTGTTATTGCGTTCGTTGCCTTGTATTTTTTATTTAAAAAAAAAAC
>E..acervulina SH, CHN, GQ153623
tgcgtctcaaagctgcttcatcaacagtgactcaatttttggggcttgggtgatgtttgctgctgcgagggaacgcttaattgaaccttatcatctaccaatctttgaatctgttttgttttcccaccacgacgcatttttgtgaagaaaagaagaggaaaaaacctgactttgcaagcatcattgccaccttttgaggggatgggatgatgatgcatgcatgggagggggaggggcggcgcatgcaccgcttggggcttttgggggctttggggctgtggtggtggggcttgcatgctacatgtgaccctggcacggctgtctatgatgagcacccatagcgccagcgtgtgttattgcgttcgttgcctcgtatttcatatttaaaaaaaaaac
>E..acervulina A, AUS, AF446055
acacattgcgtctcaaagctgcttcatcagacagtgactcaatttttggggcttggatgatgtttgctgctgcgagggaacgcttagttgaaccttatcatctaccaatctttgaatctgttttgttttcccaccacgacgcatttttgtgaagaaaaaaagaggagaaaacctgactgtgcaagcatcattgccaccttttgaagggatgggatggtgatgcatgcatgggagggggaggggcggcgcatgcaccgcttggggctttttggggctttggggctgtggtggtggggcttgcatgccacatgtgaccctggcacggctgtctatgatgagcacccatagcgccagcgtgtgttattgcgttggttgccttgtattttatatttaaaaaaa…
>E.tenella H, EUR, AF026388
acacaattcgcacgcctggaacgcgctgctggttttacaggtttcaagcattcgctttgcctgggtggccagcagcaggtagtcgtcggtgttgttggaaagaaaaatttagtccatcgcaacccttgaatctgtttttctctgcaacggtttttctactttttaaaaattgatggaattttttgctgctgcaaggatatatagcagtagtatgtacgtgggcggtcgggggggtggtggcgcatgcacgggctcgcgtggggcctgtcggtggcagccccagcgcgccggcgcagccccgtgatcgtcgatcgcgcacgtacgtggaggggattatgagaggagaagacgcgcacggggctgtgtcgtatgcagagcgctcgcggctcgggcgattgt…
>E.tenella ETSH, CHN, GQ153634
acacaattcgcacgcctggaacgcgctgctggttttacaggtttcaagcattcgctttgcctgggtggccagcagcaggtagtcgtcggtgttgttggaaagaaaaatttagtccatcgcaacccttgaatctgtttttctctgcaacggtttttctactttttaaaaattgatggaattttttgctgctgcaaggatatatagcagtagtatgtacgtgggcggtcgggggggtggtggcgcatgcacgggctcgcgtggggcctgtcggtggcagccccagcgcgccggcgccagccccgtgatcgtcgatcgcgcacgtacgtggaggggattatgagaggagaagacgcgcacggggctgtgtcgtatgcagagcgctcgcggctcgggcgattg…
>E.mitis YZ, CHN, JN113572
cacacattatgcgcgtcaggcgggctggggtttatttcctgtcctcgtctcgcttttgcgattcgtgggaggaaggaagcgtcggtaccgtcgggattggctgcttttgaaccattgttatccaatctttgaatccatagttatttctccacgacgttatttttaaaaagaaggctttttaaagtgattggcttgcatttcaactcgatttgcaggtgtgtgggaagagtatgcttggggggtatgtcggcggtggggctttggggctgcatgtgcatgcgtgcatgcggctgcagccccaagctgtgcacactggggtgtgttaccggcattctgattctctcctgcatatttttctcactgtctttgtgtttgtttaaggaaaaaaa
>E.mitis H, EUR, AF065093
ctgtgaattcatcggactggccaacccctttttggggctggcanggaagttgcgtaaatagagccctctaaaggatgcmaaagtcgtaacacggtttccgtaggtgaacctgcggaaggatcattcacacataatgcgcgtctcgcgggctggggtttatttcctgtcgtcgtctcgcttttgcgattcgtgggaggaaggaagcgtcggtaccgtcgggattggctgcttctgaaccattgttatcaaatctttgaatccatagttatttctccacgacgttatttttaaaaagaaggctttttaaagttgttttgcctgcatttcaactcgatttgcaggtgtgtgggatgagtatgcttgttggggggtctgtcggtggtggggctttggggctgc…
>E.maxima Florida, USA, AF027725
cacacattgcgtctcaaagctgctttcgcgatcacgctgtattgcgtcgcaatctgcaatcttggttgctattgtggggcatattgttgtgattcgtttgggagtttgctgcgaggaaacgcttattacaatcgtatatacccaatcattgaatcttttatttccccacaacgtatttttgagggaatttgagagttttaggagacatgtggtgcctcattgtgagtggtgagcattcgttactctatagtgagtatcgttgcgcatcaccactggattgtgggtgcgtcgcgtctctaatgatcgtctaaattgaataa
>E.maxima lower YZ, CHN, JN113578
cacacattgcgtctcaaagctgctttcgcggtcacgcggtaatgcgtcgcaatctgcaattttggttgctattgtggggcatattgttgtgattcgttcgggagtttgctgcgaggaaacgcttattacaattatatattcccaatcattgaatcttttatttccccacaacgtatttttgagggaatttgagaagcttgggagacatgtggtgcctcattgtcagtggtgtgtgcatcgttactctattgtgagtatcgttgcgcatcatcaatggatgatgggtgcgctgcgtctctaatgattatctaaattaaataaa
>E.maxima up YZ, CHN, JN113577
cacacagtgcgtcccaaagcggtttcatcatccatcatcgatcggaaaagcttttctggagcgttctgcattggtgggactgtggtgatgggggctgctgggggggaatgccagagaactagcctaacccaatcattgaatccctttcagtcttctcacaacgtacttttgaaaattaaggacacaaacaatgcctattttgtgcaattgatggatatgatgctctttagaagggtggatgtcctcttgcatgaacagggttgtgagcgcatgctggtggtggggctgcatgcatgcatgcatgcatgcagggctgcatgcatgatgcatgcatgcatgcatgcatgcacgcatgtatcgtgcatgcatacatgcgtgcaatcggtgcaacccaatgca…
>E.necatrix YZ, CHN, JN022588
cacacagtttgaacgcctagatcgcgctgctgctggatttgcaggtttcaagcgtcagctttttgccttggtggtcagctagcagtcgggtcggtcttgggtgttggaaaggaaaatttgttacaccccaatctttgaatctttttttctcagcaacgatttttctactatttaagaattaaaagggatattggtcttgcgaggcatgtgctagtagtatgggcgtgagcgatgggggagaagtggtggtgcatgcgtgggcttgcatgcgtggggcttgtcggtggcagccccagcgtgccagccccagccccatgaccagccccatagtcgtcgatcacgacgaggcgcgagaattatgatgagacttgatcggggctgcttttttttttgcaggac…
>E.necatrix GD, CHN, FJ449694
acacggtttccgtaggtgaacctgcggaaggatcattcacacagtttgaacgcctagaacgcgctgctgctggatttgcaggtttcaagcgtcagctttttgcctgggtggtcagctagcagtcgggtcggtcttgggtgttggaaaggtaaatttgttacatcccaatctttgaatcgttttttctcagcaacgatttttctactattaaaaaattaaaagggatattggtcttgcgaggcatgtgctagtagtatgggcgtgagcgatgggggagaagtggtggtgcatgcgtgggcttgcatgcgtggggcttgtcggtggcagccctagcgtgccagccccagccccatgaccagtcgtcgatcacgacgaggcgagagaattatgatgagactg…
>E.necatrix Ene-Sw1, EUR, AF026385
acacagtttgtacgcctagaacgcgctgctgctggayttacaggtttcaagcgtcacgtttttgcctgggtggtcagcgagcagtcgttcttgggtgtaggaaggaataatttgttacatcccaatctttgaatcgttttttctcagcaacgatttttctactatttaaaaattaaaaggcattttggtcttgcaaggcatgtgctagtagtagtatgggcgtgagcatggaggggaagtggtggtgtcatgcgcatgcgtggcttgcatgtgtggggcttgtcggtggcagccccagggccagccccagccccatgaccagccccatagtcgcgatcacgacgaggcgcgagaattatgatgagactgatcggggctgcttttttttttgcagacgtt…
>E.necatrix A, AUS, AF446066
acacagyttgtrcgcctagaacgcgctgctgctggacttacaggtttcaagcgtcagctttttgcctgggtggtcagctagcagtcggtcttgggtgttggaaaggaaaatttgttacatcccaatctttgaatcgttttttctcagcaacgatttttctactatttaaaaattaaaagggatattggtcttgcgaggcatgtgctagtagtatgggcgtgagcgatgggggggaagtggtggtgcatgcgtgggcttgcatgtgtggggcttgtcggtggcagccccagcgtgccagccccagccccatgcccagccccacagtcgtcgatcatgacgaggcgagggaattatgatgagactgatcggggttgcttttttttgcaggacgttcgcagc…
>E.brunetti A, AUS, AF446057
acacattacctcccgaagctgcttcagcttggattttcgctcagaataactcttttggagttttctgcatgcgggactgtgtggggctggggctgcagccgacaggggggaaaagatcagtttgagcaaaccttcgaatcaattaacgctttccaacaaagtctttttgaaaattgaagcatgaaaattaaatttgaaattggatttgatggatctgaagcgcgctggaaggagcggaaggaggcgtgcatgcggggatggggctgcatgcacgcatgcgtgcatgcatgcatgagggtggggctgcacccctgcatgcatgcacacatgcgtgcatgcatgtgtgttaccacacgggaagggtgtggttgtttcctgtgtcccattttgccgtagttt…
>E.brunetti B4-2, CHN, PP083860
acacattacctcccgaagctgcttcagcttggattttcgctcagaataactcttttggagttttctgcatgcgggactgtgtggggctggggctgcagccgacaggggagaaaagatcagtttgagcaaaccttcgaatcaattaacgctttccaacaaagtctttttgaaaattgaagcatgaaaattaaatttgaaattggatttgatggatctgaagcgcgctggaaggagcggaaggaggcgtgcatgcggggatggggctgcatgcacgcatgcgtgcatgcatgcatgagggtggggctgcacccctgcatgcatgcacacatgcgtgcatgcatgtgtgttaccacacgggaagggtgtggttgtttcctctgtcccattttgccgtagttt…
>E.praecox H, EUR, AF065092
acacattgcgtctccaagcgatttcatcatcggaatggctttttgaaagcgttttgcgatgttggagtctgctaggggggagcgccgacaaaccaacgtaaaccaatccttgaatcgctttgctttccctccacaacgttcttttgttattaaaaaagaaatgaatgaacttctctttgtatgaaagatggattttaacgatggaagatctgtcgcatgcaaggggaggtgttagcgcatgcggggggtggggctggttgggggctgcatgcatgcatgcatgcaagtatgcatgcagccccatgcatgcatgcgtgtatgcttgcatgcatggatgcatgcatgcaagtgtgtgtgtgtatgcatgtgtgkcctcaatcgatcccaccatttgcttaa…
>E.praecox YZ, CHN, JN022589
cacacattgattgtgcgtccccaagcgatttcatcattggcgaatagcttattggaagcgttttgcgatgttggaagcctgcttttggggatcgcctactaacgaacgtaaatcaatccttgaatctctgtgttttttcctccacaacgttctttgtagaagatgaaagaagtgtttcatgcttgcacctctcctctctgtttttgcatgctgccgcatgcgatttggaacgggggggtgggggggggagttagcgcatgtttaaggctgtggtggggctgtttagggctgcatgcagcatgcatgcatgcattggcgtggcttgtgtatgtatgatgtgtgtatgcatgtcctaaatagatcacacagcagcgtttgtgcgctatttaatgcaaaaaa…
>E.praecox A, AUS, AF446071
acacattgcgtctccaagcgatttcatcatcggaatggctttttgaaagcgttttgcgatgttggagtctgctaggggggagcgccgacaaaccaacgtaaaccaatccttgaatcgctttgctttccctccacaacgttcttttgttattaaaaaagaaatgaatgaacttctctttgtatgaaagatagattttaacaatggaagatctgtcgcatgcaaggggaggtgttagcgcatgcggggggtggggctggttggggctgcatgcatgcatgcatgcaagtatgcatgcagccccatgcatgcatgcgtgtatgcttgcatgcatggatgcatgcatgcaagtgtgtgtgtgtatgcatgtgtgtcctcaatcgatcccactatttgcttaat…
>E.praecox EPRESH3, CHN, GQ153629
acacattgcgtctccaagcgatttcttcatcggaatggctttttgaaagcgttttgcgatgttggagtctgctaggggggagcgccgacaaaccaacgtaaaccaatccttgaatcgctttgctttccctccacaacgttcttttgttattaaaaaagaaatgaatgaacttctctttgtatgaaagatggattttaacgatggaagatctgtcgcatgcaaggggaggtgttagcgcatgcggggggtggggctggttggggctgcatgcatgcatgcatgcaagtatgcatgcagccccatgcatgcatgcgtgtatgcttgcatgcatggatgcatgcatgcaagtgtgtgtgtgtatgcatgtgtgtcctcaatcgatcccaccatttgcttaat…
>Eimeria zuernii AB769665.1
acacattcaaaatagttttggaatgcttctgggtaacatgtttctacccactacatccaacctcctgatagttggttggcctgttgtggatagttactgttgtgtttgttcccttatggcatttccaagactgtggtcttataaaaaacctcaccacaaaaccctgtaaactattgattctttcagttccggttttttttttatttaaaaaaaaaaactggccccacaacgtcttctttcctgttaaatattttttgtttatgtttgcaataatctgcgttatgggtgatgatgacatattttaaggttttttcctttgcggttttttggccgcaaaggatatatttattaccttaaattgttgtcctcctccttatcgcggttatttctttcattaaa…
>Eimeria bovis KU351711.1
acacattcaaaatagttttggaatgctttttgggttacatttctacccatattccatccaacctgatagttggtggccttatggatagttagtgctcccttgttgcatttccaaaactgtggtctcataaaacatcacctccaaaaccctgtaaactattgattccttcagttccgtttttttttttttttaatataaaaaaaaaaaactggccccacaacgttttttttcctattaaatatttttttgttatgtttataataatagccgttatgggggacatattattaaggttgtttttttttgcggttttggccgcaagatataacactttaaattgtctcccttatcgcaattatttctttattaaagcaga
>T.gondii L49390.1
Tcacgtccttattctttattaaccatcaacctttgaatcccaagcaaaacatgagtttgcatctctctccattggagagatttgcattcaagaagcgtgatagtatcgaaaggtattattgccttcttcatgttggatatcctgcgctgcttccaatattggaagccagtgcaggtatccgggggtgcacagcgaaggggctcaatttctggaaattcgtgtctctgttgggatactgatttccaggagtttcttcagtgtgcattcttttttcccacaccgttatttcaaacaacaaatctgaggaacatttgagagagagtgaaagattgtatctttctgcatctctctcgatgtgctttcagattgcttcctaaactataatgttattttaaattt…

## Sheet: ITS2
>E.acervulina BJ, CHN, PQ738239
TTTGATCCTTTCAAACATTATATCGCCACAAATACCTGATAATGAAGAAGGGTGTTGCTGTTGTATTATCTATAATACACAGTGCTGTTCTTCTTCATTTATCTGTGTATTGGTGTGGTGGTTTCGTTTGCGCGTCGCAAATGGTGATATCTTTTGCGTCGTGTTAAGTTTGTCTCTGTGATATTTTCTCACAGCCATCAAAATAGAGTTTTGATATCCTTTCGTCCATGAAAGAGATACGGTGGTTTTGAAAACACACTGGTGTATATCTCGAAATCTATGGATGGTCCATCATACATTTATTGTGTGGTGGGGGGTAGGCGATTATCTTGATGGTTATTTTGTGAGGAATTTGTTT
>E.acervulina TW, CHN, AY742227
acgtctgtttcagtgtcttttgatcctttcaaacattatatcgccacaaatacctgataatgaagaagggtgttgctgttgtattatctatagtacacagtgctgttcttcttcatttatctgtgtattggtgtggtggtttcgtttgcgcgtcgcaaatggtgatatcttttgcgtcgtgtcaagtttttctctgtgatattttctcacagccatcaaaatagagtttcgatatcctttcgtccatgaaagagatacggtggttttgaaaacacactggtgtatatctcgaaatctatggatggtccatcatacatttattgtgtggtggggggtaggcgattatcttgatggttattttgtgaggaatttgttttagacctgaaatcagtcgaggtt…
>E.acervulina EA-12-24, USA, AY779480
tgatcctttcaaacattatatcgccacaaatacctgataatgaagaagggtgttgctgttgtattatctataatacacagtgctgttcttcttcatttatctgtgtattggtgtggtggtttcgtttgcgcgtcgcaaatggtgatatcttttgcgtcgtgttaagtttgtctctgtgatattttctcacagccatcaaaatagagtttcgatatcctttcgtccatgaaagagatacggtggttttgaaaacacactggtgtatatctcgaaatctatggatggtccatcatacatttattgtgtggtggggggtaggcgattatcttgatggttattttgtgaggaatttgttt
>E.tenella H, EUR, AF026388
taacaactcctactagtaggccatgctgctgtctgtctctgttccttgtggtcctgtgagggttcggcgatgctgccgacagaagtgagtggtttgctcgtttctgttttgtgtcgcggaattttttcggttcaccaaaggggaggtagaagcatgtttggtttcatttgagtgtcgttgcattggtattgaaggagatgcggcgtctctcgaaattgttgtcggcagcggtgctgtgtgtctgcacagcgtgccgttttacatgcctgtgctttctatagtgtcgtcgtatgctcctttcattcggaaagagagagatacggtggttgtattttatgcaacattgtttgtctcattctggacgaatgttttgagcagggctagggcgaggtataatag…
>E.tenella SH, CHN, GQ153617
taacaactcctactagtaggccatgctgctgtctgtctctgttccttgtggtcctgtgagggttcggcgatgctgccgacagaagtgagtggtttgctcgtttctgttctgtgtcgcggaattttttcggttcaccaaaggggaggtagaagcatgtttggtttcatttgagtgtcgttgcattggtattgaaggagatgcggcgtctctcgaaattgttgtcggcagcggtgctgtgtgtctgcacagcgtgccgttttacatgcctgtgctttctatagtgtcgtcgtatgctcctttcattcggaaagagagagatacggtggttgtattttatgcaacattgtttgtctcattctggacgaatgttttgagcagggctagggcgaggtataatag…
>E.tenella TW, CHN, MN252103
taacaactcctactagtaggccatgctgctgtctgtctctgttccttgtggtcctgtgagggttcggcgatgctgccgacagaagtgagtggtttgctcgtttctgttttgtgtcgcggaattttttcgggtcaccaaaggggaggtagaagcatgtttggtttcatttgagtgtcgttgcattggtattgaaggagatgcggcgtctctcgaaattgttgtcggcagcggtgctgtgcgtctgcacagtgtgccgttttttatgcctgtgctttctatagtgtcgtcgtatgctcctttcattcggaaagagagagatacggtggttgtattttatgcaacattgtttgtctcattctggacgaatgttttgagcagggctagggcgaggtataatag…
>E.mitis YZ, CHN, JN113572
tgaccccttcaaaaagtacactgccataaaagcataaaacaaggccttatgtgtctaggattttttgcttttatggtggtatcgtttgcgtgtcgcagcaaaatacatttgcatgcgtcatgtgaagttaattgtggatatagtattattcacgtataaaagcggcacctcgcttaactctatcctttcgttcacgaaagagatacggtggtgtgtaacgactcctttggggttgtgtatgctactatctcggacaaaagtgaacggagggcggcaggttttcctgttgtgagttgtgtgtgttttgcttcttatgtgggtagtatttgtatatcctgttccttccatcaatcgagatgactgatggtttggatatattatttgttt
>E.mitis 171-37, USA, FJ230360
tgaccccttcaaaaaatacactgccataaaagcatcaaacaagggcttatgtgtctaggattttttggttttatggtggtatcgtttgcgtgtcgcagcaaaatacgtttgcatgcgtcatgtgaagttgtttgtggatatactattattcacgtataaaagcggcacatcgcttaactctatcctttcgtttacgaaagagatacggtggtgtgtaacaactcctttggggttgtgtatgctactatctcgaacaaaagtgaacggagggcggcaggttttcctgttgtgagttgtgtgtgttttgctttttatgtgggtagtatttgtatatcctgatccttccatcaatcgagacgagtgatgatggttttggataaatatttatttgttttagac…
>E.maxima Florida, USA, AF027725
tgactccttcaaaaactattctgccgaagtatcctattcctttgcacaacactgttgtgctttgtgtttaagctgcatctggtggtgtcgtctgcgcgtcgatgatagtgatctctgtatcagcgtcgcgtgaaattcctaatatatttcaacaattgttgttggctatataagcagtcgttttgcgttatcctttcgttaacgaaagagatacggtggtttatgataactcactaatatctcgtacatgggtagcgttgtatcggctgctgctgacaatactcatatt
>E.maxima lower YZ, CHN, JN113578
tgactccttcaaaaattatactgccaaagtatcctatacctttgcacaacagtgttgtgttttgtgagtagggtgcttctggtggtgtcgtctgcgcgtcgatggtagtgtatatcagcgtcgcgtgaaattcctaatatatttcaacaatcgttgttggcagtataagcagtcgttttgcgttatcctttcgttaacgaaagagatacggtggttgattatgactcactaatatctcgtagatgggtagcgttgtatcggttgcggctgacaatacttatatatt
>E.maxima up YZ, CHN, JN113577
agactccttcataaagtatactgccagaacatcggtagtatggatgatcacttcgattgttgtggtggtttcgtgtgcgcgtcgctggtgatgtacacataagcgtcgcataaaatttaatgattttttcaacatgtattgttggctaagaaaagcaatcggttgccattatcctttcgttcacggaagagatacggtggtttttgtactactgaattgtatctcggagactgtggacgggtcatgggagagcggtatcgattgtatgtttcttggtggcaatagactaatcctatata
>E.necatrix N42,AUS, AM922243
taacaacttctactagtataccatgcttcgctctctgttcctcatgttcctggtagtgtgaaggttcggtggttttatgcacagaagcaagctcttgcaagtttctgttgtgagtcacggaactatctacccggagaaggggaggaggtagacagtttggtgtcatttgggtgtcgttgcacttgtgttggagcaagtgtggcgtctctctaaattgttgtcggcaggggtgctgtgtctataatgcgcacagcactaggatatgcctgtgctttctctcttttgtcgtcgtatatgctcctttcattctgaaagagagggagatacggtgattgtgtatcacaatacgcacagcacacgtttgtctcactgtggacgaatgtttaaagggctatatgg…
>E.necatrix YZ, CHN, JN022588
taacaacctctactagtataccatgtttcgctctctgttcctcatgttcctggtagtgtgaaggttcggtggttttgcgcacagaagcaagctcttgcaagtttctgttgtgagtcacggaactctctacccggagaaggggaggaggtagacagtttggtgtcatttgggtgtcgttgcatttgtgttggagcaagtgtggcgtctctctaagttgttgtcggcagcggtgctgtgtgtatgttgagcgcacagcactaggacatgcctgtgctttctccgtggtcgtcgtatatgctcctttcattctgaaagagagggagatacggtggttgtgtatcacaatacgcacagcacatgtttgtctcactgtggacgaatgtttaaaagggctatatg…
>E.praecox YZ, CHN, JN022589
tgatctcttctataagtatacttaccaacattggcagggcacagttttatgatactgtgcgcgttgaatgtgtggttggtatcatttgcacgtcgcagtatttttatatgattgcgtcgtgtgaagatttgttttggagtcaccacaagtacatattattatgtatgtgtgctgacaagcattaagattgatatggtgttatcctttcgttcatgaaagagatacggtggtttattattaagctgctgatatgtatctcatcaataatgaacgattttagcatgcatatattgggtatgttctattggaagcctatttatgtatgtgcgggataataatttattatcaattatgcttgatgtgggatatattccaaagtatttccaagatataaacata…
>E.praecox SH, CHN, GQ153621
tttgatctcttctataagtatacttaccaacattggaagggcacagtttaatgatactgtgcgcgttgaatgtgtggttggtatcatttgcacgtcgcagtatttttatatgattgcgtcgtgtgaagattggagtcaccacaagtacatattattatgtatgtgtgctgacaagcattaagattgatatggtgttatcctttcgttcatgaaagagatacggtggtttattattaagctgctgatatgtatctcatcaataatgaacgattttagcatgcatatattgggtatgttctattggaagcctatttatgtatgtgcgggataataatttattatcaattatgcttgatgtgggatatattccaaggtatgaacatatatatatctagacct…
>E.praecox P11, AUS, AM922245
tttgatctcttctataagtatacttaccaacattggcagggcacagttttatgatactgtgcgcgttgaatgtgtggttggtatcatttgcacgtcgcagtatttttatatgattgcgtcgtgtgaagatttgttttggagtcaccacaagtacatattattatgtatgtgtgctgacaagcattaagattgatatggtgttatcctttcgttcatgaaagagatacggtggtttattattaagctgctgatatgtatctcatcaataatgaacgattttagcatgcatatattgggtatgttctattggaagcctatttatgtatgtgcgggataataatttattatcaattatgcttgatgtgggatatattccaaagtatttccaagatataaaca…
>E.brunetti B16, AUS, AM922231
cttgatcttttcaagaaatacactaccacagcatgatatgtgcctggagtaggttgccatgtatatatatatgcgtatgcttactttgacattagtggtgtggtggtttcttttgctcgtcgcgatggatatttcccgatgcgtcgtgtgaagtttattggagatattttcttggtgtatagtcgatattccttatcctttcgtccacgaaagagatacggtgactcagcgagtgctactggtggatatctcggttatagtggatagcacaatgaatgggataaatggggctgtgcggctggtggtgcggactaggtcgcaccctgggagtatcgatggattgcaccttgatgtctccacatgtagactaaatacatatatttcattttagacctgaaa…
>Eimeria zuernii AB769665.1
taaactacacttcaaatacaccgccacgttttataaagaaaaaagtgtaacggcagttttgatactcttgcttgtgtcaatgaattgtcgcttgcatgtatttttttttttaaacgctttgcggtattttttgggtgtcgatatctgtgatggtgtcgtctccttaaatttgttgaattctacatgtttcatgccttctcttctggcactgtgtgttagaagtgaaggtattgttgttgttgtatgaatggcttttaataatacaaacccatatcctttcttctcctgaaagagataaggtggatggattataaatatattctccttatgtatatctcatattttgggagtttggtgaagagctgtgatggcgttgtgtatggattaagcattattctt…
>Eimeria bovis KU351711.1
taaaccacacttcaaatacaccgccgagttttataaaaaaaagtgtaacagcaggtttgacttttgtgtcaataaattcttgcttgtgcatgtattttttgacgctttgcggtattttttgggtgtcgatgcctgtaatggtgtcgtctccttaaacttttgaaattctacatgtttgatgccttctcttctggcgcggtgtgtcagaagtgaaggtattgctgttgttgtatgaatggctattaataatacaagcccatatcctttcttttcctgaaagagataaggtggatggattctaagtattctcctttctatatctcatattttaggagtttggtgaaaagctgtggtggtgttgtgtgtggattgagcattgtttggtttggtgatgatgaa…
>T.gondii JQ235842
gaaatcacaattttctgcttttttagggtcgttgcttcagtttggctgaagccccctaggagcagtatgattgggtgtcatgagtgttgaatactcaatgtcaccctgaataatgaacacagcggagaaactactcgtgcctcttcttttagaggctcaagtgtattgttgagttgtatcgatgacatcattgagatacggtggcttcttcattgaagacaaagtttcattgatgctgtcgatcgacttcaataccgcaatggaatttcggttccattgttgctctgcgaggtttcgtcgttgttgttttgtctcgggcgtttgtccgatttattt

## Sheet: E. acervulina ITS1
>E.acervulina BJ, CHN, PQ738239
TTGCGTCTCAAAGCTGCTTCATCAGACAGTGACTCAATTTTTGGGGCTTGGATGATGTTTGCTGCTGCGAGGGAACGCTTAATTGAACCTTATCATCTACCAATCTTTGAATCTGTTTTGTTTTCCCACCACGACGCATTTTTGTGAAGAAAAAGAGAGGAAAAAACCTGACTGTGCAAGCATCATTGCCACCTTTTGAAGGGATTGGATGATGATGCATGCATGGGAAGGGGGGGGGCGGCGCATGCACCGCTTGGGGCTTTTTGGGGCTTTGGGGCTGTGGTGGTGGGGCTTGCATGCTACATGTGACCCTGGCACTGCTGTCTATGATGAGCATCCATAGCGCCAGCGTGTGTTATTGCGTTCGTTGCCTTGTATTTTTTATTTAAAAAAAAAAC
>E.acervulina sam26, IRQ, PQ612086
tgcgtctcaaagctgcttcatcagacagtgactcaatttttggggcttggatgatgtttgctgctgcgagggaacgcttaattgaaccttatcatctaccaatctttgaatctgttttgttttcccaccacgacgcatttttgtgaagaaaaaaagaggaaaaaacctgactgtgcaagcatcattgccaccttttgaagggttgggatgatgatgcatgcacgggaggggggggggccgcgcatgcaccgcttggggctttttggggctttggggctgtggtggtggggcttgcatgctacatgtgaccctggcactgctgtctatgatgagcatccatagcgccagcgtgtgttattgcgttcgttgccttgtattttatatttaaaaaaaaaaaa
>E.acervulina sam25, IRQ, PQ612085
tgcgtctcaaagctgcttcatcagacagtgactcaatttttggggcttggatgatgtttgctgctgcgagggaacgcttaattgaaccttatcatctaccaatctttgaatctgttttgttttcccaccacgacgcatttttgtgaaggaaagaagaggaaaaaacctgactttgcaagcatcattgccaccttttgaagggatgggatgatgatgcatgcatgggagggggaggggcggcgcatgcaccgcttggggctttttggggctttggggctgtggttgtggggcttgcatgctacatgtgaccctggcacggctgtctatgatgagcacccatagcgccagcgtgtgttattgcgttcgttgccttgtattttatatttaaaaaaaaaaaa
>E.acervulina sam22, IRQ, PQ612023
tgcgtctcaaagctgcttcatcagacagtgactcaatttttggggcttggatgatgtttgctgctgcgagggaacgcttaattgaaccttatcatctaccaatctttgaatctgttttgttttcccaccacgacgcatttttgtgaagaaaaagagaggaaaaaacctgactttgtaagcatcattgccaccttttgaagggattggatgatgatgcatgcatgggaaggggaggggcggcgcatgcaccgcttggggctttttggggctttggggctgtggttgtggggcttgcatgctacatgtgaccctggcactgctgtctatgatgagcacccatagcgccagcgtgtgttattgcgttcgttgccttgtattttatatttaaaaaaaaaaaa
>E.acervulina Rohtak 10, IND, KJ420581
ttgcgtctcaaagctgcttcatcagacagtgactcaatttttggggcttggatgatgtttgctgctgcgagggaacgcttaattgaaccttaccatctaccaatctttgaatctgttttgttttcccaccacgacgcatttttgtgaagaaaaagagaggaaaaaacctgactttgtaagcgtcattgccattttttgaagggattggatgatgatgcatgcatgggaaggggaggggcggcgcatgcaccgcttggggctttttggggctttggggctgtggtggtggggtttgcatgctacatgtgaccctggcactgctgtctatgatgagcatccatagcgccagcgtgtgttattgcgttcgttgccttgtattttatatttaaaaaaaaac
>E.acervulina Gurgaon 2, IND, KJ420580
ttgcgtctcaaagctgcttcatcagacagtgactcaatttttggggcttggatgatgtttgctgctgcgagggaacgcttaattgaaccttatcatctaccaatctttgaatctgttttgttttcccaccacgacgcatttttgtgaagaaaaaaagaggaaaaaacctgactgtgcaagcatcattgccaccttttgaagggatgggatgatgatgcatgcatgggaaggggaggggcggcgcatgcaccgcttggggctttttggggctttggggctgtggtggtggggcttgcatgctacatgtgaccctggcacggctgtctatgatgagcacccatagcgccagcgtgtgttattgcgttcgttgccatgtattttatatttaaaaaaaaa
>E.acervulina Dehradun 13UK, IND, JX853827
ttgcgtctcaaagctgcttcatcagacggtgactcaatttttggggcttggatgatgtttgctgctgcgagggaacgcttaattgaaccttatcatctaccaatctttgaatctgttttgttttcccaccacgacgcatttttgtgaagaaaagaagaggaaaaaacctgactttgcaagcatcattgccaccttttgaagggatgggatgatgatgcatgcatgggaaggggaggggcggcgcatgcaccgcttggggctttttggggctttggggctgtggtggtggggcttgcatgctacatgtgaccctggcacggctgtctatgatgagcacccatagcgccagcgtgtgttattgcgttcgttgcctcgtattttatatttaaaaaaaaaa
>E.acervulina Mathura 41, IND, JX853826
ttgcgtctcaaagctgcttcatcagacagtgactcaatttttggggcttggatgatgtttgctgctgcgagggaacgcttaattgaaccttatcatctaccaatctttgaatctgttttgttttcccaccacgacgcatttttgtgaaggaaagaagaggaaaaaacctgactttgcaagcatcattgccaccttttgaagggatgggatgatgatgcatgcatgggagggggaggggcggcgcatgcaccgcttgtggctttttggggctttggggctgtggttgtggggcttgcatgctacatgtgaccctggcacggctgtctatgatgagcacccatagcgccagcgtgtgttattgcgttcgttgcctcgtattttatatttaaaaaaaaa
>E.acervulina AP1, IND, GQ856311
ttgcgtctcaaagctgcttcatcagacagtgactcaatttttggggcttggatgatgtttgctgctgcgagggaacgcttaattgaaccttatcatctaccaatctttgaatctgttttgttttcccaccacgacgcatttttgtgaagaaaagaagaggaaaaaacctgactgtgcaagcatcattgccaccttttgaagggatgggatgatgatgcatgcatgggagggggaggggcggcgcatgcaccgcttggggctttttggggctttggggctgtggttgtggggcttgcatgctacatgtgaccctggcactgctgtctatgatgagcacccatagcgccagcgtgtgttattgcgttcgttgccttgtattttatatttaaaaaaaaac
>E.acervulina TN1, IND, GQ856312
ttgcgtctcaaagctgcttcatcagacggtgactcaatttttggggcttggatgatgtttgctgctgcgagggaacgcttaattgaaccttatcatctaccaatctttgaatctgttttgttttcccaccacgacgcatttttgtgaagaaaagaagaggaaaaaacctgactttgcaagcatcattgccaccttttgaagggatgggatgatgatgcatgcatgggagggggaggggcggcgcatgcaccgcttggggctttttggggctttggggctgtggtggtggtggggcttgcatgctacatgtgaccctggcacggctgtctatgatgagcacccatagcgccagcgtgtgttattgcgttcgttgcctcgtattttatatttaaaaaaaaa…
>E.acervulina SH, CHN, GQ153623
tgcgtctcaaagctgcttcatcaacagtgactcaatttttggggcttgggtgatgtttgctgctgcgagggaacgcttaattgaaccttatcatctaccaatctttgaatctgttttgttttcccaccacgacgcatttttgtgaagaaaagaagaggaaaaaacctgactttgcaagcatcattgccaccttttgaggggatgggatgatgatgcatgcatgggagggggaggggcggcgcatgcaccgcttggggcttttgggggctttggggctgtggtggtggggcttgcatgctacatgtgaccctggcacggctgtctatgatgagcacccatagcgccagcgtgtgttattgcgttcgttgcctcgtatttcatatttaaaaaaaaaac
>E.acervulina A, AUS, AF446055
acacattgcgtctcaaagctgcttcatcagacagtgactcaatttttggggcttggatgatgtttgctgctgcgagggaacgcttagttgaaccttatcatctaccaatctttgaatctgttttgttttcccaccacgacgcatttttgtgaagaaaaaaagaggagaaaacctgactgtgcaagcatcattgccaccttttgaagggatgggatggtgatgcatgcatgggagggggaggggcggcgcatgcaccgcttggggctttttggggctttggggctgtggtggtggggcttgcatgccacatgtgaccctggcacggctgtctatgatgagcacccatagcgccagcgtgtgttattgcgttggttgccttgtattttatatttaaaaaaa…
>E.acervulina TR, TUR, HQ680473
ttgcgtctcaaagctgcttcatcagacagtaactcaatttttggggcttggatgatgtttgctgctgcgagggaacgcttaattgaatcttaccatctaccaatctttgaatctgttttgttttcccaccacgacgcatttttgtgaagaaaagaagaggaaaaaacctgactttgcaatcatcattgccaccttttgaagggatgggatgatgatgcatgcatgggagggggaggggcggcgcatgcaccgcttggggctttttggggcttttggggctgtggtggtggggcttgcatgctacgtgtgaccctggcacggctgtctatgatgagcacccatagcgccagcgtgtgttattgcgttcgttgccttgtattttatatttaaaaaaaaac
>E.acervulina JJ30, USA, AY779492
acacattgcgtctcaaagctgcttcatcagacagtgactcaatttttggggcttggatgatgtttgctgctgcgagggaacgcttaattgaaccttatcatctaccaatctttgaatctgttttgttttcccaccacgacgcatttttgtgaagaaaaaaagaggaaaaaacctgactatgcaagcatcattgccaccttttgaagggatgggatgatgatgcatgcatgggagggggaggggcggcgcatgcaccgcttggggctttttggggctttggggctgtggtggtggggcttgcatgctacatgtgaccctggcacggctgtctatgatgagcacccatagcgccagcgtgtgttattgcgttcgttgccttgtattttatatttaaaaaaa…
>E.acervulina JJ28, USA, AY779491
acacattgcgtctcaaagctgcttcatcagacagtgactcaatttttggggcttggatgatgtttgctgctgcgagggaacgctcaattgtaccttatcatctaccaatctttgaatctgttttgttttcccaccacgacgcatttttgtgaagaaaaagagaggaaaaaacctgactgtgcaagcatcattgccaccttttgaagggatgggatgatgatgcatgcatgggagggggaggggcggcgcatgcaccgcttggggctttttggggctttggggctgtggtggtggggcttgcatgctacatgtgaccctggcacggctgtctatgatgagcacccatagcgccagcgtgtgttattgcgttcgttgccttgtattttatatttaaaaaaa…
>E.acervulina JJ20, USA, AY779489
acacattgcgtctcaaagctgcttcatcagacagtgactcaatttttggggcttggatgatgtttgctgctgcgagggaacgcttaattgaaccttatcatctaccaatctttgaatctgttttgttttcccaccacgacgcatttttgtgaagaaaagaagaggaaaaaacctgactgtgcaagcatcattgccaccttttgaagggatgggatgatgatgcatgcatgggagggggaggggcggcgcatgcaccgcttggggctttttggggctttggggctgtggttgtggggcttgcatgctacatgtgaccctggcactgctgtctatgatgagcacccatagcgccagcgtgtgttattgcgttcgttgccttgtattttatatttaaaaaaa…
>E.acervulina JJ25, USA, AY779490
acacattgcgtctcaaagctgcttcatcagacagtgactcaatttttggggcttgggtgatgtttgctgctgcgagggaacgcttaattgaaccttatcatctaccaatctttgaatctgttttgttttcccaccacgacgcatttttgtgaagaaaagaagaggaaaaaacctgactttgcaagcatcattgccaccttttgaggggatgggatgatgatgcatgcatgggagggggaggggcggcgcatgcaccgcttggggctttttggggctttggggctgtggtggtggggcttgcatgctacatgtgaccctggcacggctgtctatgatgagcacccatagcgccagcgtgtgttattgcgttcgttgcctcgtatttcatatttaaaaaaa…
>E.acervulina JJ19, USA, AY779488
acacattgcgtctcaaagctgcttcatcagacagtgactcaatttttggggcttggatgatgtttgctgctgcgagggaacgcttaattgaaccttatcatctaccaatctttgaatctgttttgttttcccaccacgacgcatttttgtgaagaaaagaagaggaaaaaacctgactgtgcaagcatcattgccaccttttgaagggatgggatgatgatgcatgcatgggaggggggggggcggcgcatgcaccgcttggggctttttggggctttggggctgtggttgtggggcttgcatgctacatgtgaccctggcactgctgtctatgatgagcacccatagcgccagcgtgtgttattgcgttcgttgccttgtattttatatttaaaaaaa…
>E.acervulina JJ18, USA, AY779487
acacattgcgtctcaaagctgcttcatcagacagtgactcaatttttggggcttggatgatgtttgctgctgcgagggaacgcttaattgaaccttatcatctaccaatctttgaatctgttttgttttcccaccacgacgcatttttgtgaagaaaagaagaggaaaaaacctgactgtgcaagcatcattgccaccttttgaagggatgggatgatgatgcatgcatgggagggggaggggcggcgcatgcaccgcttggggctttttggggctttggggctgtggttgtggggcttgcatgctacatgtgaccctggcactgctgtctatgatgagcacccatagcgccagcgtgtgttattgcgttcgttgccttgtattttatatttaaaaaaa…
>E.acervulina JJ2, USA, AY779482
acacattgcgtctcaaagctgcttcatcagacagtgactcaatttttggggcttggatgatgtttgctgctgcgagggaacgcttaattgaaccttatcatctaccaatctttgaatctgttttgttttcccaccacgacgcatttttgtgaagaaaaagagaggaaaaaacctgactttgtaagcatcattgccaccttttgaagggattggatgatgatgcatgcatgggaaggggaggggcggcgcatgcaccgcttggggctttttggggctttggggctgtggtggtggggtttgcatgctacatgtgaccctggcactgctgtctatgatgagcacccatagcgccagcgtgtgttattgcgttcgttgccttgtattttatatttaaaaaaa…
>E.acervulina JJ1, USA, AY779481
acacattgcgtctcaaagctgcttcatcagacagtgactcaatttttggggcttggatgatgtttgctgctgcgagggaacgcttaattgaaccttatcatctaccaatctttgaatctgttttgttttcccaccacgacgcatttttgtgaagaaaaagagaggaaaaaacctgactttgtaagcatcattgccaccttttgaagggattggatgatgatgcatgcatgggaaggggaggggcggcgcatgcaccgcttggggctttttggggctttggggctgtggtggtggggtttgcatgctacatgtgaccctggcactgctgtctatgatgagcacccatagcgccagcgtgtgttattgcgttcgttgccttgtattttatatttaaaaaaa…
>E.acervulina 24, USA, AY779480
acacattgcgtctcaaagctgcttcatcagacagtgactcaatttttggggcttggatgatgtttgctgctgcgagggaacgcttaattgaaccttatcatctaccaatctttgaatctgttttgttttcccaccacgacgcatttttgtgaagaaaaagagaggaaaaaacctgactttgtaagcatcattgccaccttttgaagggattggatgatgatgcatgcatgggaaggggaggggcggcgcatgcaccgcttggggctttttggggctttggggctgtggtggtggggcttgcatgctacatgtgaccctggcactgctgtctatgatgagcatccatagcgccagcgtgtgttattgcgttcgttgccttgtattttatatttaaaaaaa…
>E.acervulina 23, USA, AY779479
acacattgcgtctcaaagctgcttcatcagacagtgactcaatttttggggcttggatgatgtttgctgctgcgagggaacgcttaattgaacattatcatctaccaatctttgaatctgttttgttatcctaccacgacgcatttttgtgaagaaaaaaagaggaaaaaacctgactgtgcaagcatcattgtcaccttttgaagagatgggatgatgatgcatgcatgggaggggggggggcggcgcatgcaccgcttggggctttttggggctttggggctgtggttgtggggcttgcatgctacatgtgaccctggcactgctgtctatgatgagcatccatagcgccagcgtgtgttattgcgttcgttgccttgtattttatatttaaaaaaa…
>E.acervulina 17, USA, AY779477
acacattgcgtctcaaagctgcttcatcagacagtgactcagtttttggggcttggatgatgtttgctgctgcgagggaacgctcaattgtaccttatcatctaccaatctttgaatctgttttgttttcccaccacgacgcatttttgtgaagaaaaagagaggaaaaaacctgactgtgcaagcatcattgccacgttttgaagggatgggatgatgatgcatgcatgggagggggaggggcggcgcatgcaccgcttggggctttttggggctttggggctgtggtggtggggcttgcatgctacatgtgaccctggcacggctgtctatgatgagcacccatagcgccagcgtgtgttattgcgttcgttgccttgtattttatatttaaaaaaa…
>E.acervulina M1, SWE, AF026384
ttgcgtctcaaagctgcttcatcagacagtgactcaatttttggggcttggatgatgtttgctgctgcgagggaacgcttaattgaaccttatcatctaccaatctttgaatctgttttgttatcccaccacgacgcatttttgtgaagaaaaaagaggaaaaaacctgactgtgcaagcatcattgccaccttttgaagggatgggatgatgatgcatgcatgggaaggggagggcggcgcatgcaccgcttggggctttttggggctttggggctgtggtggtggggcttgcatgctacatgtgaccctggcacggctgtctatgatgagcacccatagcgccagcgtgtgttattgcgttcgttgccttgtattttatattaaaaaaaaac
>E.acervulina Trpura , IND, MH620346
ttgcgtctcaaagctgcttcatcagacagtaactcaatttttggggcttggatgatgtttgctgctgcgagggaacgcttaattgaatcttaccatctaccaatctttgaatctgttttgttttcccaccacgacgcatttttgtgaagaaaagaagaggaaaaaacctgactttgcaatcatcattgccaccttttgaagggatgggatgatgatgcatgcatgggagggggaggggcggcgcatgcaccgcttggggctttttggggcttttggggctgtggtggtggggcttgcatgctacgtgtgaccctggcacggctgtctatgatgagcacccatagcgccagcgtgtgttattgcgttcgttgccttgtattttatattta
>E.acervulina Meghalaya, IND, MH620347
ttgcgtctcaaagctgcttcatcagacagtaactcaatttttggggcttggatgatgtttgctgctgcgagggaacgcttaattgaatcttaccatctaccaatctttgaatctgttttgttttcccaccacgacgcatttttgtgaagaaaagaagaggaaaaaacctgactttgcaatcatcattgccaccttttgaagggatgggatgatgatgcatgcatgggagggggaggggcggcgcatgcaccgcttggggctttttggggcttttggggctgtggtggtggggcttgcatgctacgtgtgaccctggcacggctgtctatgatgagcacccatagcgccagcgtgtgttattgcgttcgttgccttgtattttatattta
>E.acervulina 1133-26, USA, AY779466
acacattgcgtctcaaagctgcttcatcagacagtgactcaatttttggggcttggatgatgtttgctgctgcgagggaacgcttaattgaacattatcatctaccaatctttgaatctgttttgttatcccaccacgacgcatttttgtgaagaaaaaaagaggaaaaaacctgactgtgcaagcatcattgtcaccttttgaagagatgggatgatgatgcatgcatgggaggggggggggcggcgcatgcaccgcttggggctttttggggctttggggctgtggtggtggggcttgcatgctacatgtggccctggcactgctgtctatgatgagcatccatagcgccagcgtgtgttattgcgttcgttgccttgtattttttatttaaaaaaa…
>E.acervulina 1133-24, USA, AY779465
acacattgcgtctcaaacctgcttcatcagacggtgactcaatttttggggcttggatgatgtttgctgctgcgagggaacgcttaattgaaccttatcatctaccaatctttgaatctgttttgttttcccaccacgacgcatttttgtgaagaaaagaagaggaaaaaacctgactttgcaagcatcgttgccaccttttgaagggacgggacgatgatgcatgcatgggagggggaggggcggcgcatgcaccgcttggggctttttggggctttggggctgtggtggtggggcttgcatgctacatgtgaccctggcacggctgtctacgatgagcacccatagcgccagcgtgtgttattgcgttcgttgcctcgtattttatattaaaaaaa
>E.acervulina 12-3, USA, AY779469
acacattgcgtctcaaagctgcttcatcagacagtgactcaatttttggggcttggatgatgtttgctgctgtgagggaacgcttaattgaaccttatcgtctaccaatctttgaatctgttttgttttcccaccacgacgcatttttgtgaagaaaagaagaggaaaaaacctgactgtgcatgcatcattgccaccttttgaagggatgggatgatgatgcatgcatgggaaggggaggggcggcgcatgcaccgcttggggcttttcggggcttttggggctgtggtggtggggcttgcatgctacatgtgaccctggcactgctgtctatgatgagcatccatagcgccagcgtgtgttattgcgttcgttgccttgtattttatatttagaaaa…
>E.acervulina 12-2, USA, AY779468
acacattgcgtctcaaagctgcttcatcagacagtgactcaatttttggggcttggatgatgtttgctgctgtgagggaacgcttaattgaaccttatcgtctaccaatctttgaatctgttttgttttcccaccacgacgcatttttgtgaagaaaagaagaggaaaaaacctgactgtgcatgcatcattgccaccttttgaagggatgggatgatgatgcatgcatgggaaggggaggggcggcgcatgcaccgcttggggcttttcggggcttttggggctgtggtggtggggcttgcatgctacatgtgaccctggcactgctgtctatgatgagcatccatagcgccagcgtgtgttattgcgttcgttgccttgtattttatatttagaaaa…
>E.acervulina 12-1, USA, AY779467
acacattgcgtctcaaagctgcttcatcagacagtgactcaatttttggggcttggatgatgtttgctgctgcgagggaacgcttaattgaaccttatcatctaccaatctttgaatctgttttgttttcccaccacgacgcatttttgtgaagaaaaagagaggaaaaaacctgactttgtaagcatcattgccaccttttgaagggattggatgatgatgcatgcatgggaaggggaggggcggcgcatgcaccgcttggggctttttggggctttggggctgtggtggtggggcttgcatgctacatgtgaccctggcactgctgtctatgatgagcatccatagcgccagcgtgtgttattgcgttcgttgccttgtattttatatttaaaaaaa…
>T.gondii L49390
Tcacgtccttattctttattaaccatcaacctttgaatcccaagcaaaacatgagtttgcatctctctccattggagagatttgcattcaagaagcgtgatagtatcgaaaggtattattgccttcttcatgttggatatcctgcgctgcttccaatattggaagccagtgcaggtatccgggggtgcacagcgaaggggctcaatttctggaaattcgtgtctctgttgggatactgatttccaggagtttcttcagtgtgcattcttttttcccacaccgttatttcaaacaacaaatctgaggaacatttgagagagagtgaaagattgtatctttctgcatctctctcgatgtgctttcagattgcttcctaaactataatgttattttaaattt…

## Sheet: E. acervulina ITS2
>E.acervulina BJ, CHN, PQ738239
TTTGATCCTTTCAAACATTATATCGCCACAAATACCTGATAATGAAGAAGGGTGTTGCTGTTGTATTATCTATAATACACAGTGCTGTTCTTCTTCATTTATCTGTGTATTGGTGTGGTGGTTTCGTTTGCGCGTCGCAAATGGTGATATCTTTTGCGTCGTGTTAAGTTTGTCTCTGTGATATTTTCTCACAGCCATCAAAATAGAGTTTTGATATCCTTTCGTCCATGAAAGAGATACGGTGGTTTTGAAAACACACTGGTGTATATCTCGAAATCTATGGATGGTCCATCATACATTTATTGTGTGGTGGGGGGTAGGCGATTATCTTGATGGTTATTTTGTGAGGAATTTGTTT
>E.acervulina JJ30, USA, AY779492
tgatcctatcaaacattatatcgccacaaatacctgatgatgaagaagggtgttgctgttgtattatctataatacacagtgctgttcttcttcatttatctgtgtattggtgtggtggtttcgtttgcgcgtcgcaaatggtgatatcttttgcgtcgtgttaagtttgtctctgtgatattttctcacagccatcaaaatggagtttcgatatcctttcgtccatgaaagagatacggtggttttgaaaacacactggtgtatatctcgaaatttatggatggtccatcatacatttagtgtgtgatggggggtaggcgattatcttgatggttattttgtgaggaatttgttt
>E.acervulina JJ28, USA, AY779491
tgatcctttcaaacattatatcgccacaaatacctgataatgaagaagggtgttgctgttgtattatctataatacacactgctgttcttcttcatttatctgtgtattggtgtggtggtttcgtttgcgcgtcgcaaatagtgatatcttttgcgtcgtgtcaagtttttctctgtgatatttcctcacagccatcaaatacgtttttcgatatcctttcgtccatgaaagagatacggtggtttgaaaacacactggtatatatctcgaaatttatggacggtccatcatacatttgttgtgtgagggggatagtcgattatcttgatgattgctatgaggaatttgttt
>E.acervulina JJ20, USA, AY779489
tgatcctttcaaacattatatcgccacaaatacctgataatgaagaagggtgttgctgttgtattatctataatacacagtgctgttcttcttcatttatctgtgtattggtgtggtggtttcgtttgcgcgtcgcaaatggtgatatcttttgcgtcgtgttaagtttgtctctgtgatattttctcacagccatcaaaatagagtttcgatatcctttcgtccatgaaagagatacggtggttttgaaaacacactggtgtatatctcgaaatctatggatggtccatcatacatttattgtgtggtggggggtaggcgattatcttgatggttattttgtgaggaatttgttt
>E.acervulina JJ25, USA, AY779490
tgatcctttcaagcattatatcgccacaaatacctgataatgaagaagggtgttgctgttgtattatccatgatacgcagtgctgttcttcttcatttatctgtgtattggtgtggtggtttcgtttgcgcgtcgcaaatggtgatatcttttgcgtcgtgttaagtttttctctgtgatgttttctcacagccatcaaaatagagtttcgatatcctttcgtccatgaaagagatacggtggttttgaaaacacactggtgtatatctcgaaatctatggatggtccatcatacatttattgtgtggtggggggtaggcgattatcttgatggttattttgtgaggaatttgttt
>E.acervulina JJ19, USA, AY779488
tgatcctttcaaacattatatcgccacaaatacctgataatgaagaagggtgttgctgttgtattatctataatacacagtgctgttcttcttcatttatctgtgtattggtgtggtggtttcgtttgcgcgtcgcaaatggtgatatcttttgcgtcgtgttaagtttgtctctgtgatattttctcacagccatcaaaatagagtttcgatatcctttcgtccatgaaagagatacggtggttttgaaaacacactggtgtatatctcgaaatctatggatggtccatcatacatttattgtgtggtggggggtaggcgattatcttgatggttattttgtgaggaatttgttt
>E.acervulina JJ18, USA, AY779487
tgatcctttcaaacattatatcgccacaaatacctgataatgaagaagggtgttgctgttgtattatctataatacacagtgctgttcttcttcatttatctgtgtattggtgtggtggtttcgtttgcgcgtcgcaaatggtgatatcttttgcgtcgtgttaagtttgtctctgtgatattttctcacagccatcaaaatagagtttcgatatcctttcgtccatgaaagagatacggtggttttgaaaacacactggtgtatatctcgaaatctatggatggtccatcatacatttattgtgtggtggagggtaggcgattatcttgatggttattttgtgaggaatttgttt
>E.acervulina JJ2, USA, AY779482
tgatcctttcaaacattatatcgccacaaatacctgatgatgaagaagggtgttgctgttgtattatctataatacacagtgctgttcttcttcatttatctgtgtattggtgtggtggtttcgtttgcgcgtcgcaaatggtgatatcttttgcgtcgtgtcaagtttttctctgtgatattttctcacagccatcaaaatagagtttcgatatcctttcgtccatgaaagagatacggtggtttgaaaacacactggtgtatatctcgaaatttatggatggttcatcatacatttattgtgtgatggggggtaggcggttatcttgatggttattttgtgaggaatttgttt
>E.acervulina JJ1, USA, AY779481
tgatcctttcaaacattatatcgccacaaatacctgatgatgaagaagggtgttgctgttgtattatctataatacacagtgctgttcttcttcatttatctgtgtattggtgtggtggtttcgtttgcgcgtcgcaaatggtgatatcttttgcgtcgtgtcaagtttttctctgtgatattttctcacagccatcaaaatagagtttcgatatcctttcgtccatgaaagagatacggtggtttgaaaacacactggtgtatatctcgaaatttatggatggttcatcatacatttattgtgtgatggggggtaggcggttatcttgatggttattttgtgaggaatttgttt
>E.acervulina 24, USA, AY779480
tgatcctttcaaacattatatcgccacaaatacctgataatgaagaagggtgttgctgttgtattatctataatacacagtgctgttcttcttcatttatctgtgtattggtgtggtggtttcgtttgcgcgtcgcaaatggtgatatcttttgcgtcgtgttaagtttgtctctgtgatattttctcacagccatcaaaatagagtttcgatatcctttcgtccatgaaagagatacggtggttttgaaaacacactggtgtatatctcgaaatctatggatggtccatcatacatttattgtgtggtggggggtaggcgattatcttgatggttattttgtgaggaatttgttt
>E.acervulina 23, USA, AY779479
tgatcctttcaaacattatattgccacaaatacctgataatgaagaagggtgttgctgttgtattatctataatacacagtgctgttcttcttcatttatctgtgtattggtgtggtggtttcgtttgcgcgtcgcaaatggtgatatcttttgcgtcgtgtcaagtttttctctgtgatattttctcacagccatcaaaatagagtttcgatatcctttcgtccatgaaagagatacggtggttttgaaaacacactggtgtatatctcgaaatctatggatggtccatcatacatttattgtgtggtggggggtaggcgattatcttgatggttattttgtgaggaatttgttt
>E.acervulina 17, USA, AY779477
tgatcctttcaaacattatatcgccacaaatacctaataatgaagaagggtgttgctgttgtattatctataatacacactgctgttcttcttcatttatctgtgtattggtgtggtggtttcgtttgcgcgtcgcaaatagtgatatcttttgcgtcgtgtcaagtttttctctgtgatatttcctcacagccatcaaatacgtttttcgatatcctttcgtccatgaaagagatacggtggtttgaaaacacactggtatatatctcgaaatttatggacggtccatcatacatttgttgtgtgagggggatagtcgattatcttgatgattgctatgaggaatttgttt
>E.acervulina TW, CHN, AY742227
tttgatcctttcaaacattatatcgccacaaatacctgataatgaagaagggtgttgctgttgtattatctatagtacacagtgctgttcttcttcatttatctgtgtattggtgtggtggtttcgtttgcgcgtcgcaaatggtgatatcttttgcgtcgtgtcaagtttttctctgtgatattttctcacagccatcaaaatagagtttcgatatcctttcgtccatgaaagagatacggtggttttgaaaacacactggtgtatatctcgaaatctatggatggtccatcatacatttattgtgtggtggggggtaggcgattatcttgatggttattttgtgaggaatttgttt
>E.acervulina 1133-26, USA, AY779466
tgatcctttcaaacattatatcgccacaaatacctgataatgaagaagggtgttgctgttgtattatctataatacacagtgctgttcttcttcatttatctgtgtattggtgtggtggtttcgtttgcgcgtcgcaaatggtgatatcttttgcgtcgtgttaagtttgtctctgtgatattttctcacagccatcaaaatagagtttcgatatcctttcgtccatgaaagagatacggtggtttgaaaacacactggtgtatatctcgaaatttatggatggtccatcatacatttattgtgtgatggggggtaggcgattatcttgatggttattttgtgaggaatttgttt
>E.acervulina 1133-24, USA, AY779465
tgatcctttcaagcattatatcgccacaaatacctgataatgaagaagggtgttgctgttgtattatccatgatacacagtgctgttcttcatttatctgtgtattggtgtggtggtttcgtttgcgcgtcgcaaatggtgatatcttttgcgtcgtgttaagtttttctctgtgatgttttctcacagccatcaaaatagagtttcgatatcctttcgtccatgaaagagatacggtggtttgaaaacacactggtgcatatctcgaaatttatggatggtccatcatacatttattgtgtggtggggggtaggcgattatcttgatggttattttgtgaggaatttgttt
>E.acervulina 12-3, USA, AY779469
tgatcctttcaaacattatatcgccacaaatacctggtaatgaagaagggtgttggtgttgtattatctacaatacacagtgctgttcttcttcatttatctgtgtattggtgtggtggtttcgtttgcgcgtcgcaaatggtgataccttttgcgtcgtgttaagtttgtctctgtgatattttctcacagccatcaaaatagagtttcgatatcctttcgtccatgaaagagatacggtggttttgaaaacacactggtgtatatctcgagatctatggatggtccatcatacatttattgtgtggtggggggtaggcgattatcttgatggttattttgtgagggatttgttt
>E.acervulina 12-2, USA, AY779468
tgatcctttcaaacattatatcgccacaaatacctggtaatgaagaagggtgttggtgttgtattatctacaatacacagtgctgttcttcttcatttatctgtgtattggtgtggtggtttcgtttgcgcgtcgcaaatggtgataccttttgcgtcgtgttaagtttgtctctgtgatattttctcacagccatcaaaatagagtttcgatatcctttcgtccatgaaagagatacggtggttttgaaaacacactggtgtatatctcgagatctatggatggtccatcatacatttattgtgtggtggggggtaggcgattatcttgatggttattttgtgagggatttgttt
>E.acervulina 12-1, USA, AY779467
tgatcctttcaaacattatatcgccacaaatacctgataatgaagaagggtgttgctgttgtattatctataatacacagtgctgttcttcttcatttatctgtgtattggtgtggtggtttcgtttgcgcgtcgcaaatggtgatatcttttgcgtcgtgtcaagtttttctctgtgatattttctcacagccatcaaaatagagtttcgatatcctttcgtccatgaaagagatacggtggttttgaaaacacactggtgtatatctcgaaatctatggatggtccatcatatatttattgtgtggtggggggtaggcgattatcttgatggttattttgtgaggaatttgttt
>E.acervulina SH, CHN, GQ153618
ttgatcctttcaagcattatatcgccacaaatacctgataatgaagaagggtgttgctgttgtattatccatgatacacagtgctgttcttcttcatttatctgtgtattggtgtggtggtttcgtttgcgcgtcgcaaatggtgatatcttttgcgtcgtgttaagtttttctctgtgatgttttctcacagccatcaaaatagagtttcgatatcctttcgtccatgaaagagatacggtggttttgaaaacacactggtgtatatctcgaaatctatggatggtccatcatacatttattgtgtggtggggggtaggcgattatcttgatggttattttgtgaggaatttgttt
>E.acervulina JJ16, USA, AY779486
tgatcctatcaaacattatatcgccacaaatacctgatgatgaagaagggtgttgctgttgtattatctataatacacagtgctgttcttcttcatttatctgtgtattggtgtggtggtttcgtttgcgcgtcgcaaatggtgatatcttttgcgtcgtgttaagtttgtctctgtgatattttctcacagccatcaaaatggagtttcgatatcctttcgtccatgaaagagatacggtggttttgaaaacacactggtgtatatctcgaaatttatggatggtccatcatacatttagtgtgtgatggggggtaggcgattatcttgatggttattttgtgaggaatttgttt
>T.gondii JQ235842
gaaatcacaattttctgcttttttagggtcgttgcttcagtttggctgaagccccctaggagcagtatgattgggtgtcatgagtgttgaatactcaatgtcaccctgaataatgaacacagcggagaaactactcgtgcctcttcttttagaggctcaagtgtattgttgagttgtatcgatgacatcattgagatacggtggcttcttcattgaagacaaagtttcattgatgctgtcgatcgacttcaataccgcaatggaatttcggttccattgttgctctgcgaggtttcgtcgttgttgttttgtctcgggcgtttgtccgatttattt
